CORRECTION

# Correction: A Single *parS* Sequence from the Cluster of Four Sites Closest to *oriC* Is Necessary and Sufficient for Proper Chromosome Segregation in *Pseudomonas aeruginosa*

Paulina Jecz, Aneta A. Bartosik, Krzysztof Glabski, Grazyna Jagura-Burdzy

In [Fig 1](#), the table in panel B is incorrect. Please see the corrected [Fig 1](#) here.

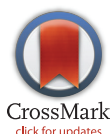

## OPEN ACCESS

**Citation:** Jecz P, Bartosik AA, Glabski K, Jagura-Burdzy G (2016) Correction: A Single *parS* Sequence from the Cluster of Four Sites Closest to *oriC* Is Necessary and Sufficient for Proper Chromosome Segregation in *Pseudomonas aeruginosa*. PLoS ONE 11(3): e0152541. doi:10.1371/journal.pone.0152541

**Published:** March 24, 2016

**Copyright:** © 2016 Jecz et al. This is an open access article distributed under the terms of the [Creative Commons Attribution License](#), which permits unrestricted use, distribution, and reproduction in any medium, provided the original author and source are credited.

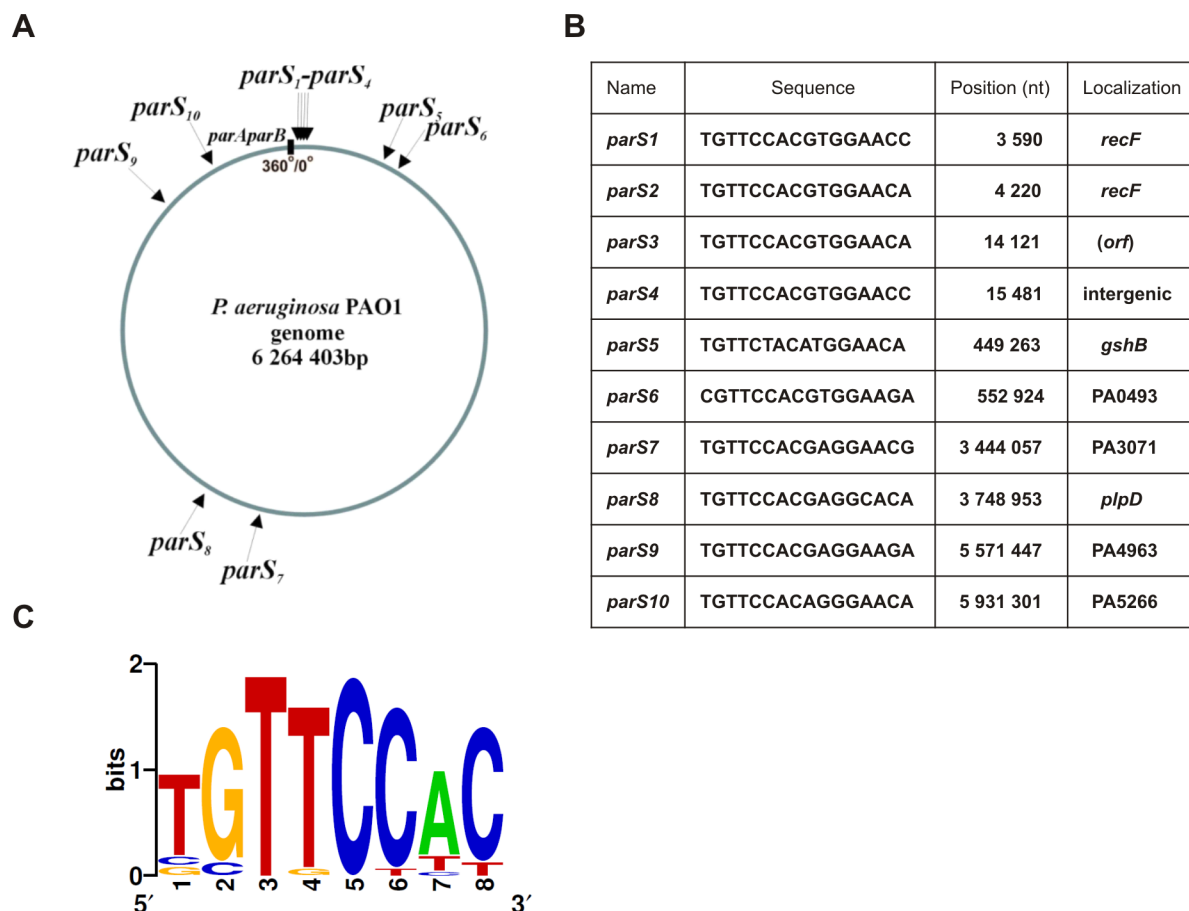

**Fig 1. The *parS* sites and their localization in the *Pseudomonas aeruginosa* genome.** (A) Circular map of the *P. aeruginosa* genome with locations of putative ParB binding sequences [9]. Position of the *parA-parB* operon is shown as black rectangle, grey arrow marks *oriC*, black arrows indicate predicted *parS* sites. (B) Nucleotide sequences, genomic coordinates and gene locations of the *parS* sites. The sequences are presented in a clockwise configuration. The coordinates are given according to the genomic sequence of the PAO1-UW strain [69]. (C) Sequence logo for all twenty 8-bp half-sites in the *P. aeruginosa* PAO1-UW genome (weblogo.berkeley.edu/logo.cgi). Nucleotides at positions 2 and 5 are invariant in all half-sites.

doi:10.1371/journal.pone.0152541.g001

## Reference

1. Jecz P, Bartosik AA, Glabski K, Jagura-Burdzy G (2015) A Single *parS* Sequence from the Cluster of Four Sites Closest to *oriC* Is Necessary and Sufficient for Proper Chromosome Segregation in *Pseudomonas aeruginosa*. PLoS ONE 10(3): e0120867. doi:10.1371/journal.pone.0120867 PMID: 25794281
